# Supplementary material
Source: Springer Nature journal article supplement (https://www.springerprofessional.de/resource/supplementary/40702_2024_1049_MOESM2_ESM.docx/26789064)
Supplement: MOESM2 [file 26789064]

**Onlinematerial 2** Antwortcluster der Befragten zu Chancen, Bedenken und Hürden des Einsatzes von betrieblichen KI-Anwendungen

| **Cluster 1: Chancen** | **Cluster 2: Bedenken** | **Cluster 3: Hürden** |
| --- | --- | --- |
| Elemente der **Mitarbeitendenförderung:**     - Inklusion - Bessere Arbeitsbedingungen - Arbeitserleichterung - Assistenzpotenzial - Übernahme repetitiver Aufgaben | Elemente des **Kontrollverlusts**:   - Missbrauchspotenzial - Diskriminierungspotenzial - Erhöhte Komplexität - Erhöhter Arbeitsdruck | Erhöhter **Organisationsaufwand**:   - Fehlen von Leitlinien und Grenzen - Notwendiger Kulturwandel - Herausforderung der Dezentralität |
| Elemente der **Unklarheit** („black box“) und des blinden **Vertrauens:**   - Unklare Entscheidungskriterien (z.B. Aussortierung im HR) - Fehlervervielfältigung - Blindes Annehmen des Outputs | Elemente der **Unklarheit** in der **Zusammenarbeit** zwischen Menschen und Technik:   - Neue Aufgaben für Menschen sind zu definieren - Datenschutz - Fragwürdigkeit in der Ethik - Mangel an Sensibilisierung - Fehlende Transparenz - Black-Box-Charakter von KI |
| Elemente der **Produktivitätssteigerung:**   - Gesteigerte Produktivität - Zeitersparnis - Effizienz - Kostenersparnis | Elemente der **Wegrationalisierung** von Arbeitsplätzen oder der **Dequalifizierung**:   - KI nicht für jede/n zugänglich - Verlust von Arbeitsplätzen | **Komplexität** der zugrundeliegenden Technik:   - Z. B. hohe Rechenleistung nötig |
| Elemente der **Visionsänderung**:   - Wissensmanagement - Höhere Genauigkeit - Gesteigerte Produktivität |  |  |
